# Supplementary material
Source: PubMed Central journal article supplement (PMC5135444)

**Lycorine decreases HMGB1 to Inhibit Autophagy and Enhances Bortezomib Activity in Multiple Myeloma**

**SUPPLEMENTAL INFORMATION**

**SUPPLEMENTARY TABLE S1. Outline of MM xenograft mice treatment strategy**

| <b>Days of drug injection</b> | <b>1</b>        | <b>2</b> | <b>3</b> | <b>4</b> | <b>5</b> | <b>6</b> | <b>7</b> | <b>8</b> | <b>9</b> | <b>10</b> | <b>11</b> |
|-------------------------------|-----------------|----------|----------|----------|----------|----------|----------|----------|----------|-----------|-----------|
| <b>Control</b>                | +               | +        | +        | -        | +        | +        | +        | -        | +        | +         | +         |
| <b>Lycorine</b>               | +               | +        | +        | -        | +        | +        | +        | -        | +        | +         | +         |
| <b>BTZ</b>                    | +               | -        | -        | -        | +        | -        | -        | -        | +        | -         | -         |
| <b>Combination</b>            | <b>Lycorine</b> | -        | +        | +        | -        | -        | +        | +        | -        | -         | +         |
|                               | <b>BTZ</b>      | +        | -        | -        | -        | +        | -        | -        | +        | -         | -         |

**SUPPLEMENTARY FIGURE LEGENDS**

**Supplementary Figure S1. Lycorine induced apoptosis in MM cell.** MM cells were incubated with indicated concentration of lycorine for 24 h. Apoptosis was determined by FACS analysis using Annexin V/PI staining.

**Supplementary Figure S2. Combined effect of lycorine and BTZ is time dependent.** Cells were treated for the indicated time with 10  $\mu$ M lycorine or 15 nM BTZ or lycorine plus BTZ and cell lysate were harvested for western blotting to detect HMGB1 and autophagy marker LC3B level. GAPDH was used as a loading control.

**Supplementary Figure S3. Cell viability assay for BMSC HS5 cells.** The BMSC cell line HS5 was treated with different doses of lycorine. A CCK-8 assay was used to check the cell survival rate.

**Supplementary Figure S4. Combine effect of lycorine and BTZ against MM cells in the presence of BMSC HS5 cells.** A number of combinations of lycorine (LYC) and BTZ were used to treat MM cell lines ANBL6 and ARP-1 in the presence of BMSC HS5 cells. A CCK-8 assay was used to check the efficiency.

**Supplementary Figure S5. Expression of HMGB1 mRNA in MM xenograft tumor.** HMGB1 mRNA expression level in xenograft mice was analyzed by qRT-PCR. GAPDH was used as an internal control. Results are presented with mean $\pm$ SD with no significant differences.

## Supplementary Figure S1

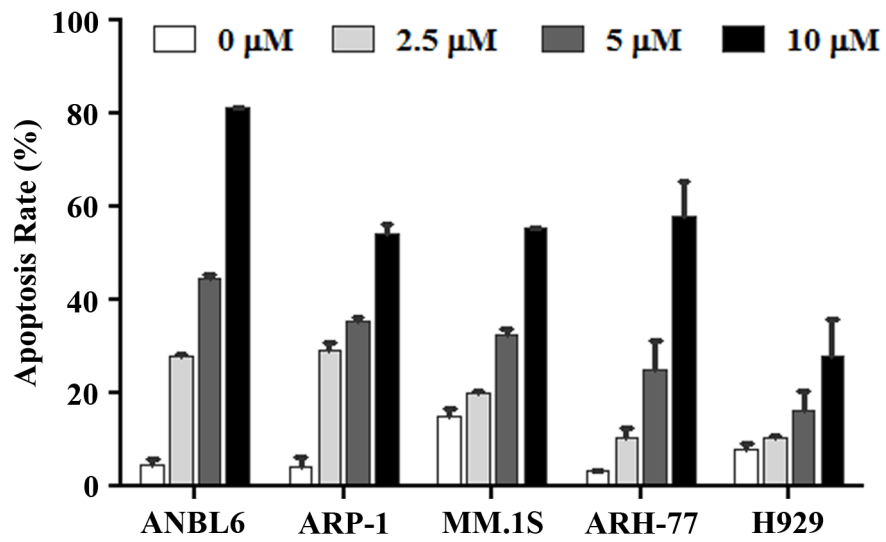

## Supplementary Figure S2

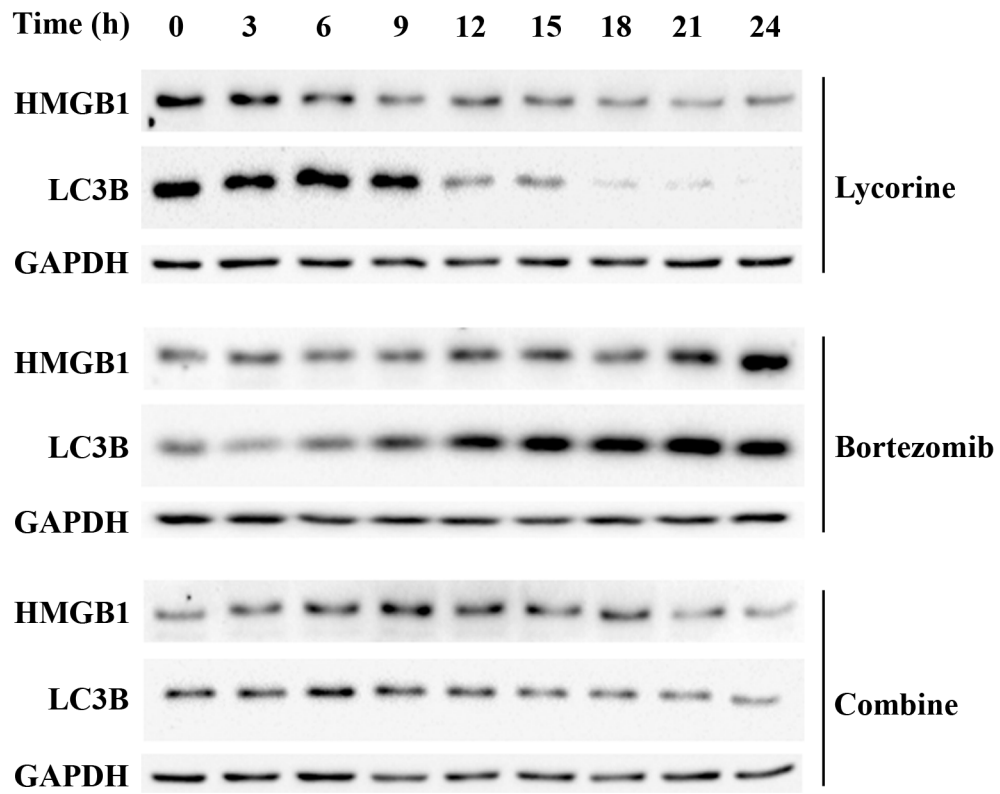

### Supplementary Figure S3

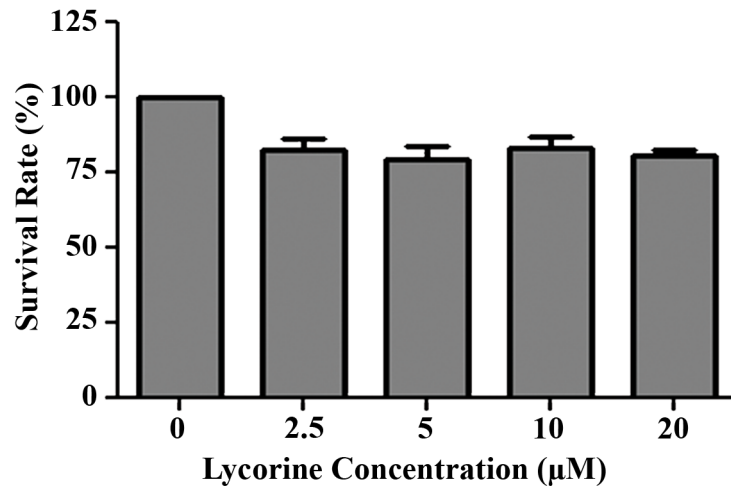

Supplementary Figure S4

ANBL6

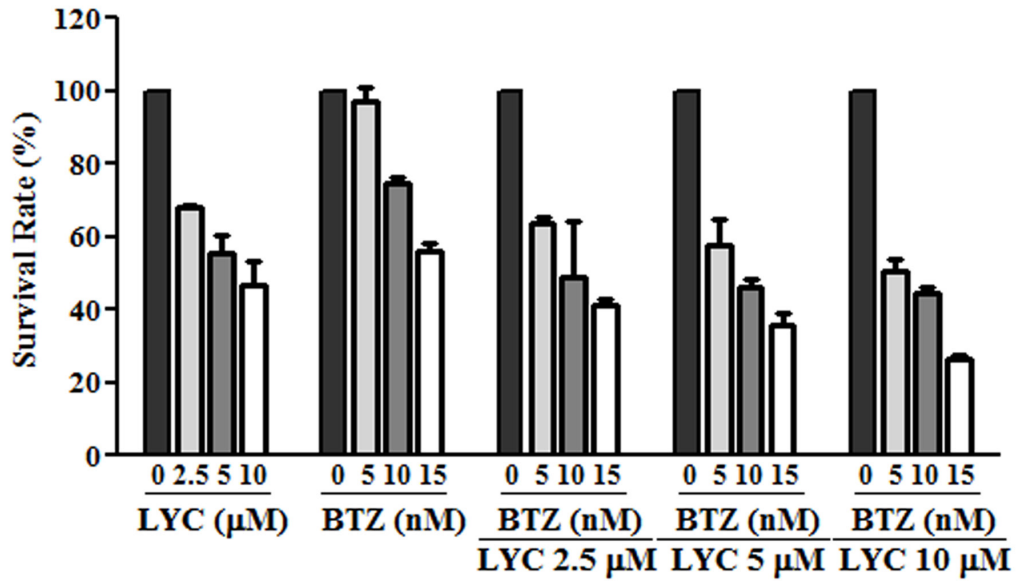

ARP-1

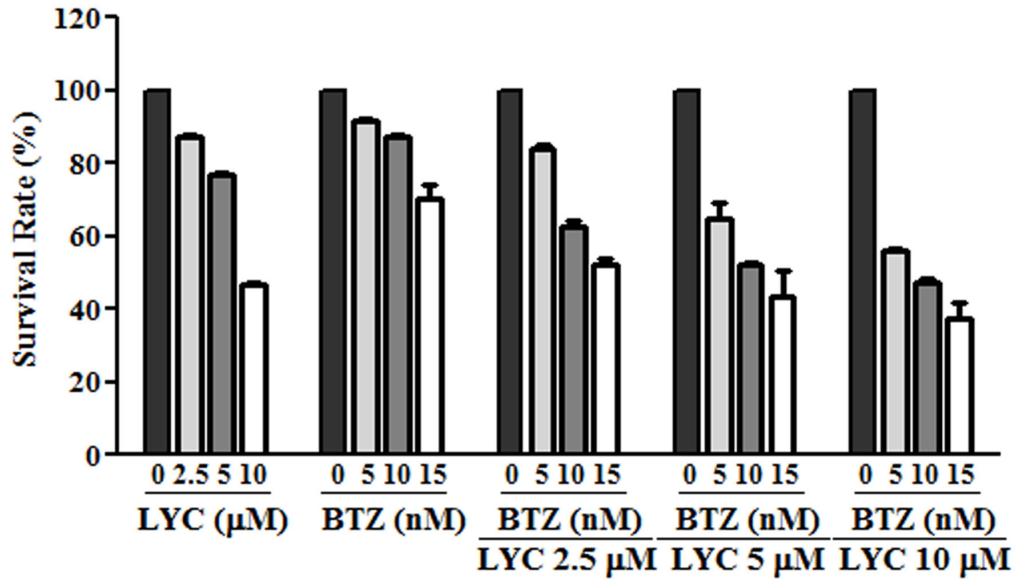

Supplementary Figure S5

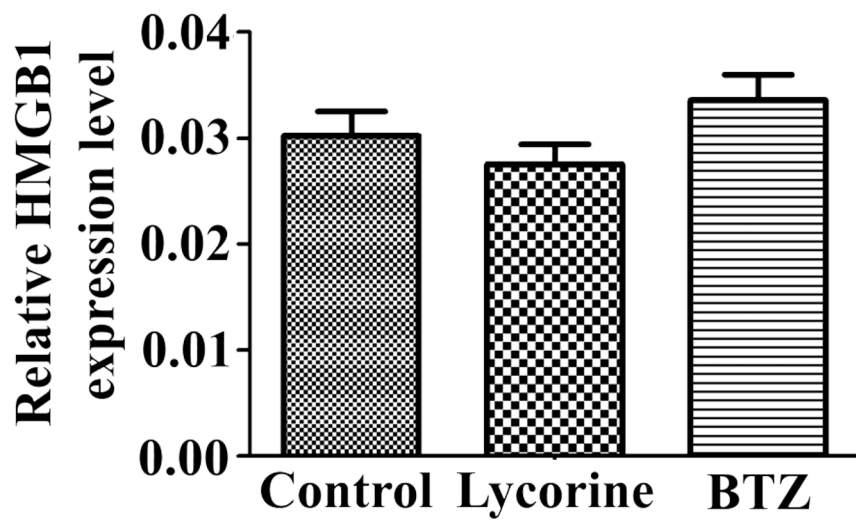

Supplement: thnov06p2209s1.pdf [file thnov06p2209s1.pdf]
